# Supplementary material
Source: MDPI journal article supplement (https://www.mdpi.com/2413-8851/5/1/5)
Supplement: s1 [file s1]

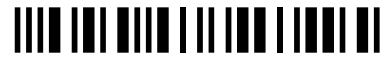

**Welcome to our survey.**

**The aim of this research is to assess public attitudes towards certain urban features in Brisbane. The research will help understand how people benefit from their urban space and how it might better be designed and become more multi-functional.**

**This short survey (estimated as 8 minutes) will ask you about the functions of and your views on a local urban ‘feature’. Your participation in this survey is entirely voluntary and you may drop out at any time by choosing to not complete the survey.**

EXAMPLE

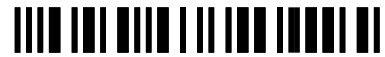

## **Section A: Terms and Conditions**

### **A1. Terms and conditions**

Please note that your participation in this research is completely confidential. At no time will identifiable information about you be used. Your answers will be collated with other answers and used anonymously.

Your participation in this research does not involve any risks other than what you would encounter in daily life. Completing the survey will be taken as your consent to participate

At the end of survey, you will be asked for contact information if you wish to enter the Prize Draw (one of three \$50 shopping vouchers) and/or be kept up to date about the research. This contact information will be kept separately from your answers, so there will be no way of identifying your data. Any information you provide will only be used to contact you in the event you win the Prize Draw or to send you project updates.

If you have any inquiries about the project or you would like to express your interest to participate, please contact any of the following research team members:

#### **Contact Details:**

**Dr Edward Morgan** (07) 3735 9248 [ed.morgan@griffith.edu.au](mailto:ed.morgan@griffith.edu.au)

**Mr Hadi Zamanifard** (07) 3735 5442  
[h.zamanifard@griffith.edu.au](mailto:h.zamanifard@griffith.edu.au)

Griffith University conducts research in accordance with the National Statement on Ethical Conduct in Research Involving Humans. This research has been approved by GU Ethics Committee (GU Ref No: 2018/841). If you have any concerns or complaints about the ethical conduct of the research project please contact the Manager, Research Ethics on 3735 4375 or [research-ethics@griffith.edu.au](mailto:research-ethics@griffith.edu.au).

The conduct of this research involves the collection, access and use of your de-identified personal information and views. As outlined elsewhere in this information sheet, your de-identified personal information may appear in the publications or reports arising from this research. This is occurring with your consent. Any additional personal information collected is confidential and will not be disclosed to third parties without your consent, except to meet government, legal or other regulatory authority requirements. A de-identified copy of this data may be used for other research purposes. However, your anonymity will at all times be safeguarded, except where you have consented otherwise. For further information consult the University's Privacy Plan at <http://www.griffith.edu.au/about-griffith/plans-publications/griffith-university-privacy-plan> or telephone (07) 3735 4375.

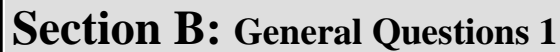

## Section C: Advanced questions

|                    |  |
|--------------------|--|
| Not at all clearly |  |
|--------------------|--|

7







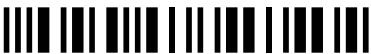

Section E: Demographic questions

E1. Please specify your age range:

18–19

20–24

25–29

30–34

35–39

40–44

45–49

50–54

55–59

60–64

65–69

70–74

75–79

80–84

85 and over

E2. Gender:

E3. Please select your highest education qualification:

- Secondary education
- Certificate
- Diploma
- Bachelor Degree
- Graduate Diploma
- Postgraduate
- Other

Other

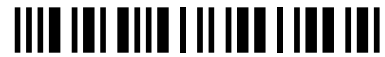

**E4. Please specify your total weekly household income:**

\$0-500

\$501-1000

\$1001-1500

\$1501-2500

\$2501-5000

Greater than \$5000

Prefer not to say

Other

Other

[illegible]

**E5. Please specify your occupation area:**

Managerial

Professional

Technician/Trade

Community and Personal Service

Clerical and Administrative

Sales

Technicians/Trades

Machinery Operators or Driver

Labourer

University student

Other

Other

[illegible]

**E6. How long you have been residing in this area?**

Less than 1 year

|  |  |
|--|--|
|  |  |
|--|--|

1-5 years

|  |  |
|--|--|
|  |  |
|--|--|

6-10 years

7

More than 10 years

7

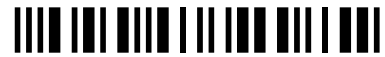

## Section F: Know more about this space:

Know more about this space:

### Bioretention basins

As you may know, this green space is a bioretention basin, which is used to treat stormwater. Bioretention basins are soil and plant-based stormwater treatment systems consisting of vegetation and porous filtering media (such as sandy loam and under-drainage). A bioretention system filters run-off water through a vegetated filter as the stormwater percolates, pollutants are retained through fine filtration, adsorption and biological uptake of nutrients by vegetation (e.g. garden beds).

Bioretention basins and other stormwater treatment assets in Brisbane are part of the Brisbane City Council WaterSmart Strategy that endeavours to support the liveability of Brisbane by managing water sustainably. The ultimate goal of the stormwater treatment assets is to have healthier waterways and eventually cleaner oceans. In addition, they have a range of other benefits including cooling the air, decreasing the chance of flooding, aesthetic improvement, greenery and biodiversity, and (where possible) social functionality.

Thank you for your participation in this research.

We very much appreciate your time and feedback. Your response contributes to making better stormwater treatment assets, cleaner waterways, and a more sustainable environment.

[Go to Prize Draw Page](#)

If you would like to be entered into a prize draw for a \$50 shopping voucher (three vouchers in total), give feedback about this survey or receive more information, please [click here](#) and provide your contact details and then click submit. Otherwise, please just hit submit.

\*Note: contact details will be stored in a different database and will not be stored with the answers given above.

### F1. Do you think this feature enhances or diminishes your local environment?

Very enhancing ☐

Enhancing ☐

Neither enhancing nor diminishing ☐

Diminishing ☐

Very diminishing ☐

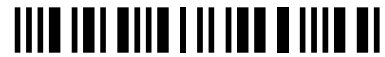

**F2. To what extent do you agree/disagree with the following statement:**

**"My local council is doing enough to ensure healthy waterways by treating stormwater."**

Strongly agree ☐

Agree ☐

Neither agree nor disagree ☐

Disagree ☐

Strongly disagree ☐

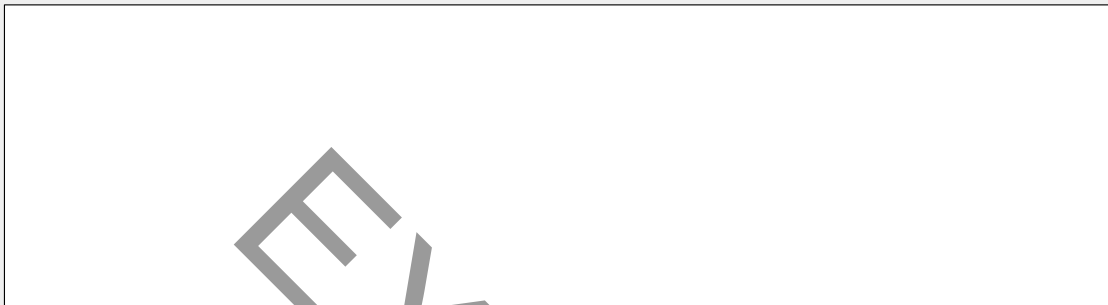

**F3. Do you have any suggestions to improve Council's effort to treat stormwater?**

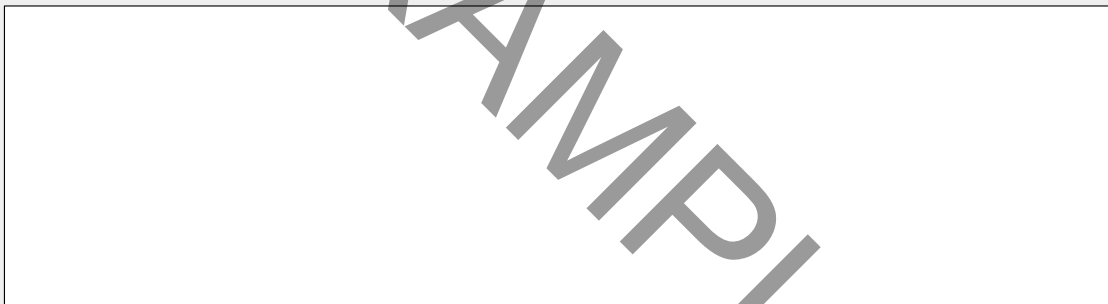

**Thank you.**

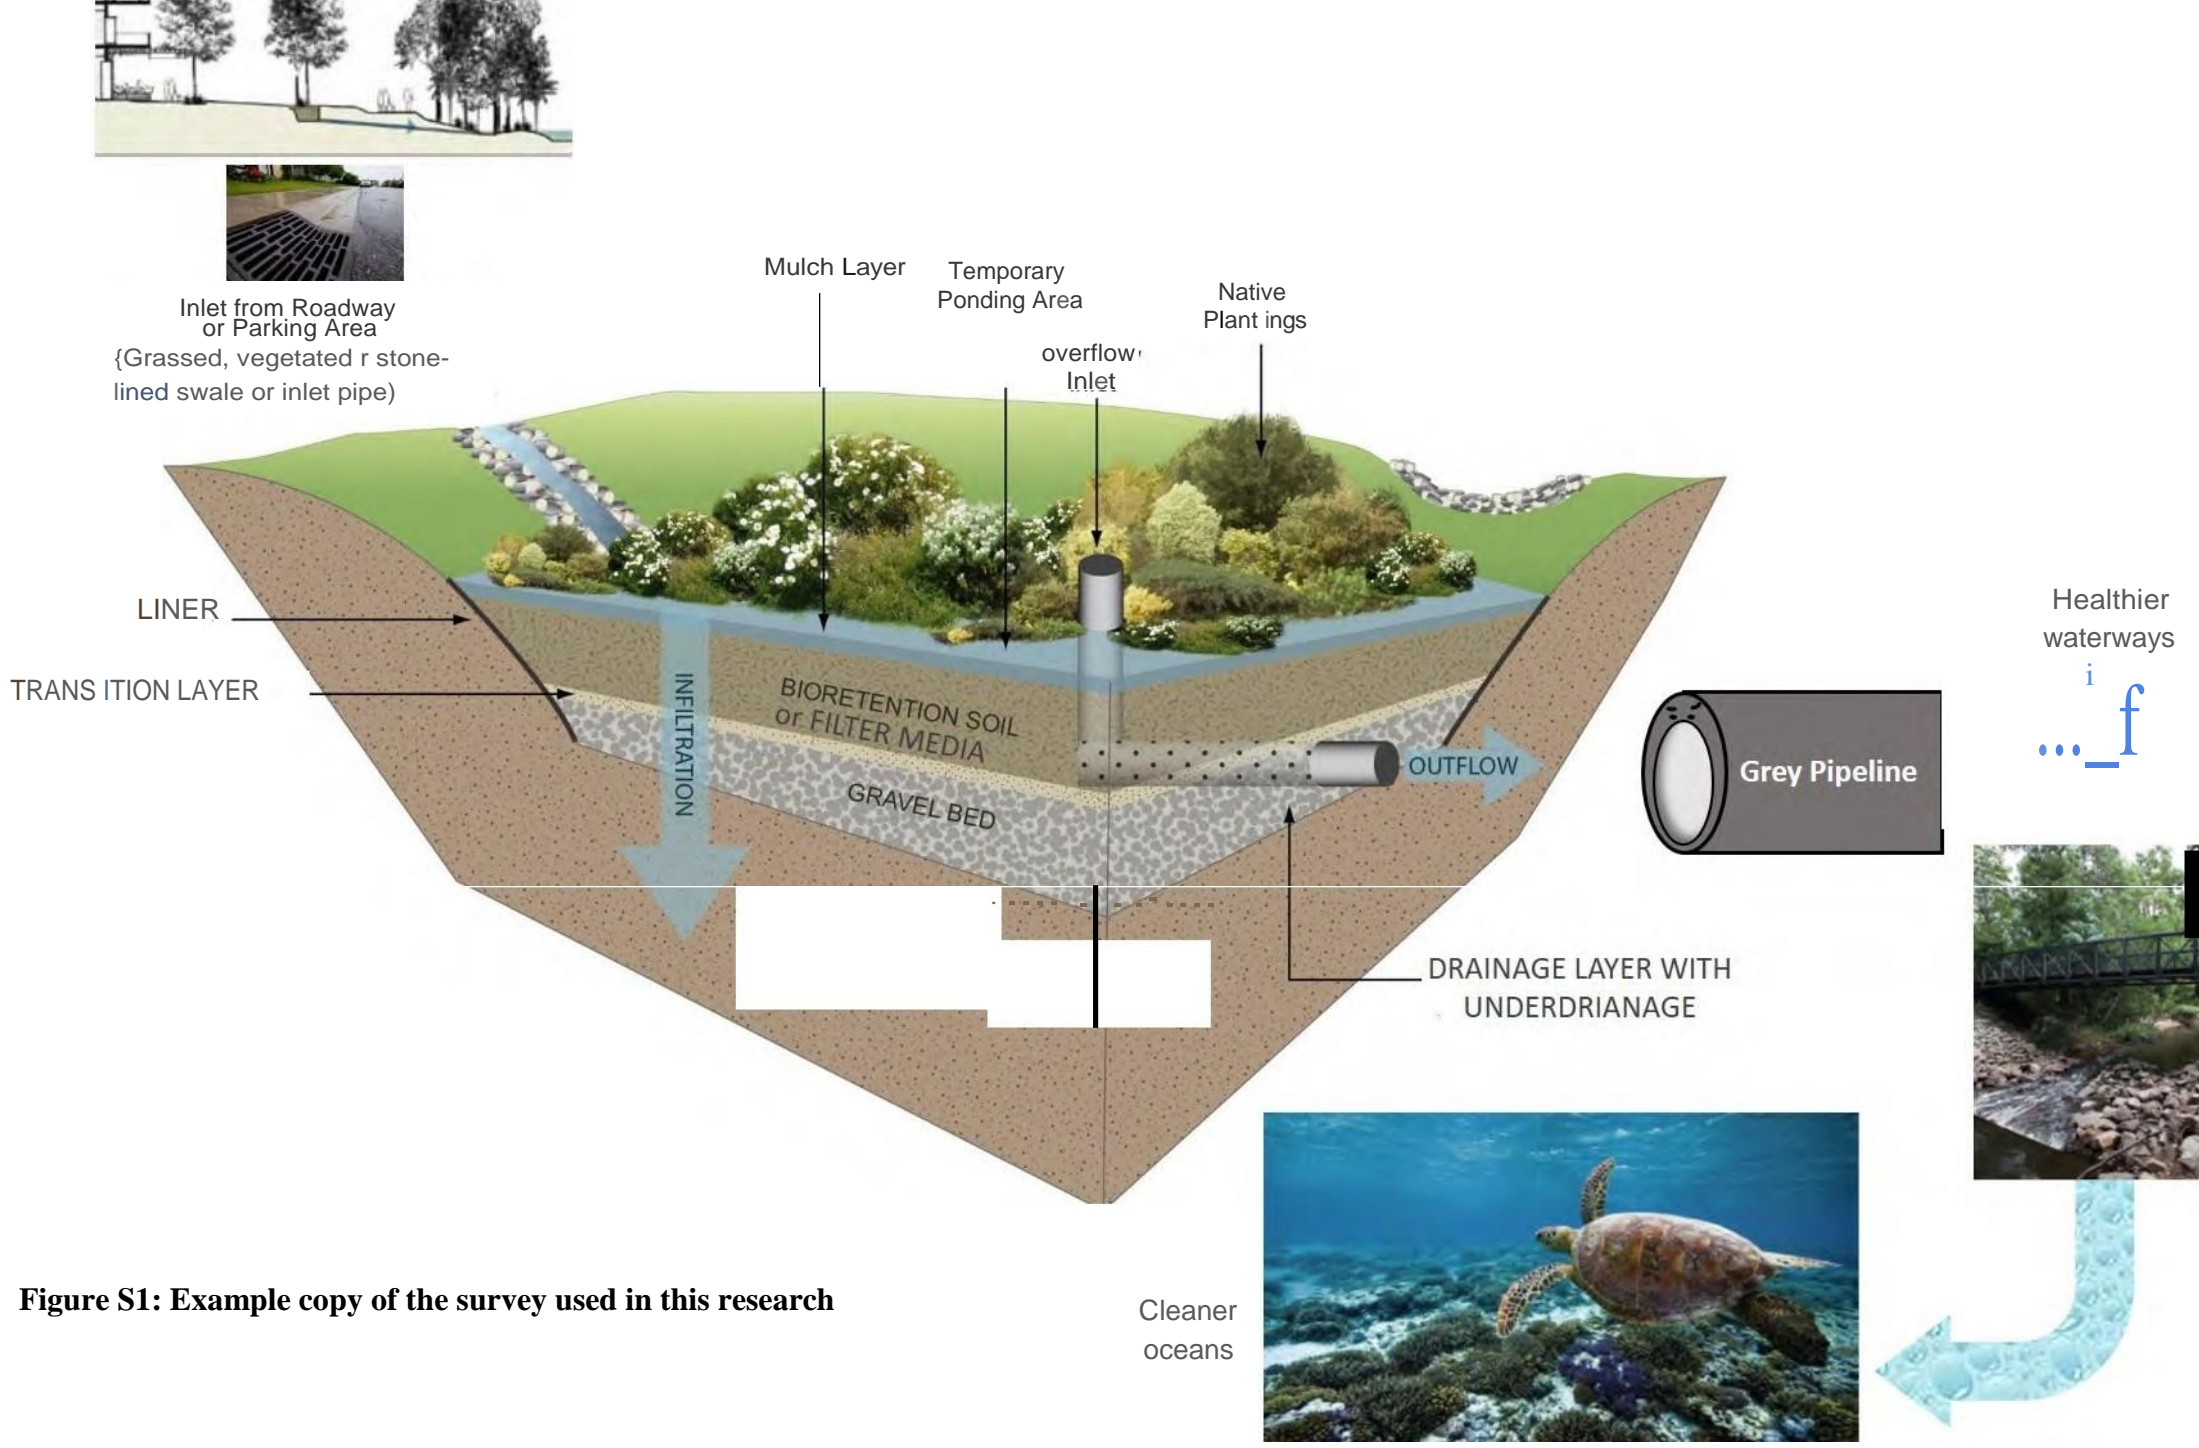

**Figure S1: Example copy of the survey used in this research**
